# Supplementary material for: Retrospective cohort study of androgen deprivation therapy and the risk of diabetes in men with prostate cancer in Lithuania
Source: PubMed Central journal article supplement — BMJ Open. 2021 Jul 28;11(7):e045797. doi: 10.1136/bmjopen-2020-045797 (PMC8319979; doi:10.1136/bmjopen-2020-045797), 2021-07-28
Supplement: bmjopen-2020-045797.draft_revisions.pdf [file bmjopen-2020-045797.draft_revisions.pdf]

# BMJ Open

BMJ Open is committed to open peer review. As part of this commitment we make the peer review history of every article we publish publicly available.

When an article is published we post the peer reviewers' comments and the authors' responses online. We also post the versions of the paper that were used during peer review. These are the versions that the peer review comments apply to.

The versions of the paper that follow are the versions that were submitted during the peer review process. They are not the versions of record or the final published versions. They should not be cited or distributed as the published version of this manuscript.

BMJ Open is an open access journal and the full, final, typeset and author-corrected version of record of the manuscript is available on our site with no access controls, subscription charges or pay-per-view fees (<http://bmjopen.bmj.com>).

If you have any questions on BMJ Open's open peer review process please email [info.bmjopen@bmj.com](mailto:info.bmjopen@bmj.com)

# BMJ Open

## Androgen deprivation therapy and the risk of diabetes in men with prostate cancer

|                               |                                                                                                                                                                                                                                                                                                                                                                                                                                                                                                                                                                                                                                           |
|-------------------------------|-------------------------------------------------------------------------------------------------------------------------------------------------------------------------------------------------------------------------------------------------------------------------------------------------------------------------------------------------------------------------------------------------------------------------------------------------------------------------------------------------------------------------------------------------------------------------------------------------------------------------------------------|
| Journal:                      | <i>BMJ Open</i>                                                                                                                                                                                                                                                                                                                                                                                                                                                                                                                                                                                                                           |
| Manuscript ID                 | bmjopen-2020-045797                                                                                                                                                                                                                                                                                                                                                                                                                                                                                                                                                                                                                       |
| Article Type:                 | Original research                                                                                                                                                                                                                                                                                                                                                                                                                                                                                                                                                                                                                         |
| Date Submitted by the Author: | 15-Oct-2020                                                                                                                                                                                                                                                                                                                                                                                                                                                                                                                                                                                                                               |
| Complete List of Authors:     | Drevinskaite, Mingaile; Nacionalinis vėžio institutas, Laboratory of cancer epidemiology; Vilnius University, Faculty of medicine<br>Patasius, Ausvydas; Nacionalinis vėžio institutas, Laboratory of cancer epidemiology; Vilniaus Universitetas, Faculty of Medicine, Institute of Health Sciences<br>Kincius, Marius; Nacionalinis vėžio institutas, Laboratory of Clinical Oncology<br>Urbonas, Vincas; Nacionalinis vėžio institutas, Laboratory of cancer epidemiology<br>Smailyte, Giedre; National Cancer Institute, Laboratory of Cancer Epidemiology; Vilniaus Universitetas, Faculty of Medicine, Institute of Health Sciences |
| Keywords:                     | Prostate disease < UROLOGY, General diabetes < DIABETES & ENDOCRINOLOGY, Epidemiology < ONCOLOGY                                                                                                                                                                                                                                                                                                                                                                                                                                                                                                                                          |
|                               |                                                                                                                                                                                                                                                                                                                                                                                                                                                                                                                                                                                                                                           |

SCHOLARONE™  
Manuscripts

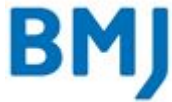

I, the Submitting Author has the right to grant and does grant on behalf of all authors of the Work (as defined in the below author licence), an exclusive licence and/or a non-exclusive licence for contributions from authors who are: i) UK Crown employees; ii) where BMJ has agreed a CC-BY licence shall apply, and/or iii) in accordance with the terms applicable for US Federal Government officers or employees acting as part of their official duties; on a worldwide, perpetual, irrevocable, royalty-free basis to BMJ Publishing Group Ltd ("BMJ") its licensees and where the relevant Journal is co-owned by BMJ to the co-owners of the Journal, to publish the Work in this journal and any other BMJ products and to exploit all rights, as set out in our [licence](#).

The Submitting Author accepts and understands that any supply made under these terms is made by BMJ to the Submitting Author unless you are acting as an employee on behalf of your employer or a postgraduate student of an affiliated institution which is paying any applicable article publishing charge ("APC") for Open Access articles. Where the Submitting Author wishes to make the Work available on an Open Access basis (and intends to pay the relevant APC), the terms of reuse of such Open Access shall be governed by a Creative Commons licence – details of these licences and which [Creative Commons](#) licence will apply to this Work are set out in our licence referred to above.

Other than as permitted in any relevant BMJ Author's Self Archiving Policies, I confirm this Work has not been accepted for publication elsewhere, is not being considered for publication elsewhere and does not duplicate material already published. I confirm all authors consent to publication of this Work and authorise the granting of this licence.

1  
2  
3  
4  
5  
6  
7  
8

## Androgen deprivation therapy and the risk of diabetes in men with prostate cancer

9 Mingaile Drevinskaite <sup>1,3</sup> Ausvydas Patasius <sup>1,4</sup>, Marius Kincius <sup>2</sup>, Vincas Urbonas <sup>2</sup>, Giedre Smailyte <sup>1,4</sup>

11  
12  
13  
14  
15 <sup>1</sup> Laboratory of Cancer Epidemiology, National Cancer Institute, Vilnius, Lithuania

16 <sup>2</sup> Laboratory of Clinical Oncology, National Cancer Institute, Vilnius, Lithuania

17 <sup>3</sup> Faculty of Medicine, Vilnius University, Vilnius, Lithuania

18 <sup>4</sup> Institute of Health Sciences, Faculty of Medicine, Vilnius University, Vilnius, Lithuania  
19  
20  
21  
22  
23  
24

25 Corresponding author: Mingaile Drevinskaite

26 Email.: mingaile.drevinskaite@nvi.lt

27 P.Baublio 3b, Vilnius, LT-08406, Lithuania

28 Tel.: +37052190911  
29  
30  
31  
32  
33  
34  
35  
36  
37  
38  
39  
40  
41  
42  
43  
44  
45  
46  
47  
48  
49  
50  
51  
52  
53  
54  
55  
56  
57  
58  
59  
60

## Abstract

**Objectives:** To examine the risk of type 2 diabetes in prostate cancer patients and its association with androgen deprivation therapy.

**Design and participants:** Patients diagnosed with prostate cancer in the Lithuanian male population between January 1, 2003 and December 31, 2012 were identified through the Lithuanian Cancer registry. All prostate cancer cases were linked to the National Health Insurance Fund (NHIF) database to obtain information regarding the diagnosis of diabetes mellitus and information on prescriptions of antiandrogens and gonadotropin-releasing hormone (GnRH) agonists. Prostate cancer patients were followed up until the diagnosis of type 2 diabetes, or December 31, 2017, or date of death, whichever came first. Cox proportional hazard models were used to estimate the risk of type 2 diabetes in prostate cancer patients with or without ADT exposure.

**Results:** 27 580 men were diagnosed with prostate cancer, out of whom 14 502 (52.58%) did not receive ADT and 13 078 (47.42%) were treated with ADT. The incidence of type 2 diabetes for all prostate cancer patients was 7.4/1000 person-years, for men on GnRH agonists 9.0/1000 person-years and 5.8/1000 person-years for men on antiandrogens. There was an increased risk of developing type 2 diabetes comparing androgen deprivation therapy users and non-users (HR = 1.49, 95% CI = 1.34 to 1.66).

**Conclusion:** This study showed an increased risk of diabetes in prostate cancer patients treated with ADT in comparison to ADT-free patient cohort. GnRH agonist users showed higher susceptibility, while the group on antiandrogen monotherapy showed no such increase.

### Strengths and limitations

- Large cohort size, population-based design and long observation time (up to 15 years) are strengths of our study.
- Lack of clinical information regarding treatment modality, applied for patients in combination with ADT, especially information on surgical castration.
- Differences in ADT treatment groups could be influenced by selection bias, as GnRH agonists are used for treatment of metastatic disease, however differences in ADT treatment groups remains after adjusting to stage of disease.

## Funding

This research received no specific grant from any funding agency in the public, commercial or not-for-profit sectors

## Competing interests

The authors declare no conflict of interest.

## Abbreviations:

AA – antiandrogens

ADT – androgen deprivation therapy

CI – confidence interval

GnRH - gonadotropin-releasing hormone

HR - Hazard ratio

NHIF - National Health Insurance Fund

SE – standard error

## 1. Introduction

Prostate cancer is one of the most prevalent malignancies and the second leading cause of cancer-related deaths in men worldwide [1]. The growth of prostate cancer cells is dependent on androgens; therefore, androgen deprivation therapy (ADT) is recommended treatment in men with metastatic prostate cancer. ADT is also used in clinically locally advanced prostate cancer in conjunction with radiotherapy as either adjuvant or neoadjuvant therapy [2].

ADT results in a rapid decrease in serum concentrations of testosterone to castration level by reducing testicular androgens secretion or by inhibiting the androgen receptors. Androgen deprivation can also be achieved with surgery (orchiectomy) or medications (gonadotropin-releasing hormone (GnRH) agonists, GnRH antagonists or oral antiandrogens (AA)). In addition, complete androgen blockade using combination of GnRH analogues and antiandrogens can also be used in some clinical cases [3]. If prostate cancer patients progress to castrate resistance state, it is recommended to continue ADT [4].

1  
2  
3 Hypogonadism produced by ADT leads to adverse effects, such as increased risk of  
4 cardiovascular disease and metabolic syndrome, anaemia, sexual dysfunction, decreased  
5 genital size, gynaecomastia, diminished quality of life, cognitive lesion, hot flushes and  
6 reduced bone mineral density [5–8]. One of the newest long-term effect observed in other  
7 studies is ADT increasing insulin resistance and having an impact on type 2 diabetes  
8 development [5,9–12].  
9

10  
11 In our large population-based cohort study, we examined the risk of type 2 diabetes in  
12 prostate cancer patients and its association with ADT.  
13

## 14 **2. Research Design and Methods**

### 15 **Study population**

16  
17 Patients diagnosed with prostate cancer in the entire Lithuanian male population between  
18 January 1, 2003 and December 31, 2012 were identified through the Lithuanian Cancer  
19 registry. The database includes information about the date of diagnosis, age at diagnosis,  
20 tumour stage (classified by TNM), cause and date of death. Lithuanian data on cancer  
21 incidence is included Cancer Incidence in Five Continents, a longstanding collaboration  
22 between the International Agency for Research on Cancer and the International Association  
23 of Cancer Registries, which serves as a unique source of cancer incidence data from high-  
24 quality population-based cancer registries around the world [13].  
25

26  
27 All prostate cancer cases were linked to the National Health Insurance Fund (NHIF) database  
28 in order to obtain information regarding the diagnosis of diabetes mellitus and information on  
29 prescriptions of antiandrogens and GnRH agonists. The National Health Insurance Fund  
30 (NHIF) database contains demographic data and entries on the primary and secondary  
31 healthcare services provided, emergency and hospital admissions and prescriptions of  
32 reimbursed medications. Data from the Lithuanian NHIF database encompasses about 98%  
33 of inpatient cases and 90% of outpatient visits (up to 100% of primary health care visits) in  
34 Lithuania, covering the entire territory of the country [14].  
35

36  
37 In total between January 1, 2003 and December 31, 2012 29247 cases of prostate cancer were  
38 identified. Prostate cancer patients with date of prostate cancer diagnosis equal to the date of  
39 death (607 cases) and patient with diabetes mellitus diagnosis before prostate cancer  
40 diagnosis (1060 cases), were excluded from the analysis. 27580 prostate cancer patients  
41 were included in this study.  
42  
43  
44  
45  
46  
47  
48  
49  
50  
51  
52  
53  
54  
55  
56  
57  
58  
59  
60

## Statistical analysis

We analyzed risk of diabetes between men on ADT, and prostate cancer patients not treated with ADT. Identified patients were followed till the date of type 2 diabetes diagnosis, or December 31, 2017, or date of death, whichever came first.

In order to evaluate incidence of diabetes caused by ADT we calculated exact person-years at risk for each patient.

Cox proportional hazard models were used to estimate hazard ratios and their 95% confidence intervals to compare risk of diabetes in groups of prostate cancer patients by ADT exposure. Multivariate adjusted Cox proportional hazards models including age and stage at diagnosis were conducted to estimate the effect of ADT on diabetes risk. Association between duration of GnRH agonists use and diabetes risk was assessed by dividing duration into the following intervals: 0-1, 1-2, 2-3, 3-5 and more than 5 years.

All statistical analyses were carried out using STATA statistical software (version 15.1; College Station, TX, USA). The Vilnius Regional Biomedical Research Ethics Committee approved this study.

## Patient and public involvement

This article does not contain any studies with human participants. No patients were involved in this study. Our study was based on retrospective data collected in national health insurance fund database.

## 3. Results

**Table 1** presents baseline characteristics of 27 580 men who were diagnosed with prostate cancer, out of whom 14 502 (52.58%) did not receive ADT and 13 078 (47.42%) were treated with ADT. The vast majority of patients (92.25%) received GnRH agonists and 7.75% received antiandrogens.

During follow-up period there were 1371 prostate cancer patients diagnosed with type 2 diabetes. The incidence of type 2 diabetes for all prostate cancer patients (ADT users and ADT non-users) was 7.4/1000 person-years. For those who have never used ADT the incidence was 6.0/1000 person-years. Type 2 diabetes Incidence for ADT users was 8.8/1000 person-years, for men on GnRH agonists 9.0/1000 person-years and 5.8/1000 person-years for men on antiandrogens (**Table 2**).



1  
2  
3 There was a significantly increased risk of developing of type 2 diabetes comparing ADT  
4 users with ADT non-users (HR = 1.49, 95% CI = 1.34 to 1.66) (**Table 3**). Adjusted hazards  
5 models for patient's age and tumour's stage also showed a statistically higher risk of  
6 developing type 2 diabetes (aHR = 1.47, 95% CI = 1.32 to 1.64) in ADT users group. As  
7 compared to ADT non-users the usage of GnRH agonists was associated with an increased  
8 risk of type 2 diabetes (HR = 1.53, 95% CI = 1.38 to 1.71), however, there was no significant  
9 association between oral antiandrogen monotherapy and outcome.

10  
11  
12 **Table 4** reports diabetes risk in the group of GnRH agonists users. There were no significant  
13 differences in risk by duration of GnRH agonists exposure duration.

#### 20 21 **4. Discussion**

22  
23 Our prostate cancer patient cohort study showed increased risk of diabetes in ADT users  
24 compared to ADT-free patient cohort. In accordance with other studies, elevated risk was  
25 found among GnRH agonist users, while in the antiandrogen monotherapy group no such  
26 increase was observed.

27  
28  
29  
30 ADT, which decreases serum testosterone levels by inhibiting testosterone production, has  
31 been the first line treatment for men with locally advanced or metastatic prostate cancer since  
32 1940 [15]. ADT can reduce circulating testosterone levels to castration levels, however,  
33 previous studies have shown that low levels of testosterone might decrease lean body mass  
34 growth and increase fat deposition, also might cause insulin resistance by reducing insulin  
35 sensitivity [16,17]. The association between ADT users in prostate cancer patients and insulin  
36 resistance was identified in *Basaria et al.* study. Patients who received ADT for at least 12  
37 months had an increased risk of developing insulin resistance and hyperglycaemia. Forty-four  
38 percents of ADT patients had glucose levels in the diabetic range and the duration of ADT  
39 was linked to the severity of these metabolic abnormalities [9]. *Bosco et al.* meta-analysis  
40 results suggested that ADT usage for prostate cancer patients increased risk of diabetes by  
41 36% [18]. In our study we also observed that ADT usage increases the risk of diabetes  
42 compared to ADT non-users (HR: 1.49 95% CI 1.34 to 1.66).

43  
44  
45  
46  
47  
48  
49  
50  
51  
52  
53 *Keating et al.* found that the treatment with GnRH agonists is associated with an increased  
54 risk of type 2 diabetes compared to ADT non-users (HR for GnRH agonists versus no ADT:  
55 1.44, 95% CI: 1.34 – 1.55) [5]. *Crawley et al.* evaluated the risk of type 2 diabetes for the  
56 patients treated with GnRH agonists or antiandrogens. They found that GnRH agonists  
57  
58  
59  
60

1  
2  
3 increase the risk of type 2 diabetes. In contrast management with antiandrogens was not  
4 associated with type 2 diabetes [12]. In our study we showed the highest risk of diabetes was  
5 in GnRH agonists users group (HR: 1.53, 95% CI 1.38 to 1.71). This data is in line with  
6 above mentioned studies.  
7  
8  
9

10  
11 The duration of ADT is a very important factor when trying to establish the link between type  
12 2 diabetes and ADT. *Keating et al.* showed increase risk of type 2 diabetes for patients on  
13 GnRH agonists, however, this study had a relatively short duration (up to 25 months) [5]. To  
14 our knowledge *Crawley et colleagues* were the first that evaluated different types of ADT and  
15 the effect of treatment duration. They examined the risk of type 2 diabetes with up to ten  
16 years of exposure. In their study they revealed that patients on GnRH agonists during the first  
17 3 years (2 – 2.5 years of exposure HR: 1.68, 95% CI 1.40 to 2.02) had the highest risk of  
18 developing type 2 diabetes [12]. Similarly, we showed that the highest incidence of diabetes  
19 was in the 3-year-exposure group (HR: 1.77, 95% CI 1.44 to 2.18), however, the risk was  
20 also significantly elevated in other categories.  
21  
22  
23  
24  
25  
26  
27  
28

29 Intermittent ADT treatment was suggested as alternative treatment to continuous ADT with  
30 possibly fewer complications and better quality of life [19]. *Rezaei et al.* study's results  
31 showed that in short-term treatment with intermittent ADT there was no difference in fasting  
32 blood glucose, which suggests lower risks of diabetes mellitus in this group of patients [20].  
33 Thus, difference in diabetes risk increase between non-users and ADT users could be  
34 mitigated by the proportion of intermittent ADT user in our cohort, whom we could not  
35 identify from our database. However, according to general used prostate cancer treatment  
36 guidelines intermittent ADT could be applicable only for very small and well-informed  
37 fraction of prostate cancer patients [21]. Therefore, we consider that this should not influence  
38 the final results of our study.  
39  
40  
41  
42  
43  
44  
45

46 Large cohort size, population-based design and long observation time (up to 15 years) are  
47 strengths of our study. Main limitation of our study is lack of clinical information regarding  
48 treatment modality, applied for patients in combination with ADT, especially information on  
49 surgical castration. This type of ADT is not common in clinical practice, therefore inclusion  
50 of those cases in non-ADT patients group has no substantial effect on diabetes risk  
51 evaluation. Another limitation is that differences in ADT treatment groups could be  
52 influenced by selection bias, as GnRH agonists are used for treatment of metastatic disease,  
53 however differences in ADT treatment groups remains after adjusting to stage of disease.  
54  
55  
56  
57  
58  
59  
60

## 5. Conclusion

This study showed that there is increased risk of diabetes in prostate cancer patients treated with ADT in comparison with ADT-free patient cohort. GnRH agonist users showed higher susceptibility while the group on antiandrogen monotherapy showed no such increase.

## References

1. Siegel RL, Miller KD, Jemal A. Cancer statistics, 2019. *CA Cancer J Clin*. 2019 Jan;69(1):7–34.
2. Parker C, Gillessen S, Heidenreich A, Horwich A, ESMO Guidelines Committee. Cancer of the prostate: ESMO Clinical Practice Guidelines for diagnosis, treatment and follow-up. *Ann Oncol*. 2015 Sep;26 Suppl 5:v69-77.
3. Jhan J-H, Yeh H-C, Chang Y-H, Guu S-J, Wu W-J, Chou Y-H, et al. New-onset diabetes after androgen-deprivation therapy for prostate cancer: A nationwide propensity score-matched four-year longitudinal cohort study. *J Diabetes Complicat*. 2018;32(7):688–92.
4. Lycken M, Garmo H, Adolfsson J, Stattin P, Holmberg L, Bill-Axelsson A. Patterns of androgen deprivation therapies among men diagnosed with localised prostate cancer: a population-based study. *Eur J Cancer*. 2014 Jul;50(10):1789–98.
5. Keating NL, O'Malley AJ, Smith MR. Diabetes and cardiovascular disease during androgen deprivation therapy for prostate cancer. *J Clin Oncol*. 2006 Sep 20;24(27):4448–56.
6. Choo R, Chander S, Danjoux C, Morton G, Pearce A, Deboer G, et al. How are hemoglobin levels affected by androgen deprivation in non-metastatic prostate cancer patients? *Can J Urol*. 2005 Feb;12(1):2547–52.
7. Nguyen PL, Alibhai SMH, Basaria S, D'Amico AV, Kantoff PW, Keating NL, et al. Adverse effects of androgen deprivation therapy and strategies to mitigate them. *Eur Urol*. 2015 May;67(5):825–36.
8. Rhee H, Gunter JH, Heathcote P, Ho K, Stricker P, Corcoran NM, et al. Adverse effects of androgen-deprivation therapy in prostate cancer and their management. *BJU Int*. 2015 Apr;115 Suppl 5:3–13.
9. Basaria S, Muller DC, Carducci MA, Egan J, Dobs AS. Hyperglycemia and insulin resistance in men with prostate carcinoma who receive androgen-deprivation therapy. *Cancer*. 2006 Feb 1;106(3):581–8.
10. Keating NL, O'Malley AJ, Freedland SJ, Smith MR. Diabetes and cardiovascular disease during androgen deprivation therapy: observational study of veterans with prostate cancer. *J Natl Cancer Inst*. 2010 Jan 6;102(1):39–46.
11. Lage MJ, Barber BL, Markus RA. Association between androgen-deprivation therapy and incidence of diabetes among males with prostate cancer. *Urology*. 2007 Dec;70(6):1104–8.
12. Crawley D, Garmo H, Rudman S, Stattin P, Häggström C, Zethelius B, et al. Association between duration and type of androgen deprivation therapy and risk of diabetes in men with prostate cancer. *Int J Cancer*. 2016 Dec 15;139(12):2698–704.

- 1  
2  
3 13. Bray F, Ferlay J, Laversanne M, Brewster DH, Gombe Mbalawa C, Kohler B, et al. Cancer  
4 Incidence in Five Continents: Inclusion criteria, highlights from Volume X and the global status  
5 of cancer registration. *Int J Cancer*. 2015 Nov 1;137(9):2060–71.  
6
- 7 14. Navickas R, Visockienė Ž, Purnaitė R, Rukšėnienė M, Kasiulevičius V, Jurevičienė E. Prevalence  
8 and structure of multiple chronic conditions in Lithuanian population and the distribution of  
9 the associated healthcare resources. *Eur J Intern Med*. 2015 Apr;26(3):160–8.  
10
- 11 15. Huggins C, Stevens RE, Hodges CV. STUDIES ON PROSTATIC CANCER: II. THE EFFECTS OF  
12 CASTRATION ON ADVANCED CARCINOMA OF THE PROSTATE GLAND. *Arch Surg*. 1941 Aug  
13 1;43(2):209–23.  
14
- 15 16. Smith MR. Changes in fat and lean body mass during androgen-deprivation therapy for  
16 prostate cancer. *Urology*. 2004 Apr;63(4):742–5.  
17
- 18 17. Smith MR, Lee H, Nathan DM. Insulin sensitivity during combined androgen blockade for  
19 prostate cancer. *J Clin Endocrinol Metab*. 2006 Apr;91(4):1305–8.  
20
- 21 18. Bosco C, Crawley D, Adolfsson J, Rudman S, Van Hemelrijck M. Quantifying the evidence for the  
22 risk of metabolic syndrome and its components following androgen deprivation therapy for  
23 prostate cancer: a meta-analysis. *PLoS ONE*. 2015;10(3):e0117344.  
24
- 25 19. Tunn UW, Canepa G, Kochanowsky A, Kienle E. Testosterone recovery in the off-treatment  
26 time in prostate cancer patients undergoing intermittent androgen deprivation therapy.  
27 *Prostate Cancer Prostatic Dis*. 2012 Sep;15(3):296–302.  
28
- 29 20. Rezaei MM, Rezaei MM, Ghoreifi A, Kerigh BF. Metabolic syndrome in patients with prostate  
30 cancer undergoing intermittent androgen-deprivation therapy. *Can Urol Assoc J*. 2016;10(9–  
31 10):E300–5.  
32
- 33 21. Hussain M, Tangen CM, Berry DL, Higano CS, Crawford ED, Liu G, et al. Intermittent versus  
34 Continuous Androgen Deprivation in Prostate Cancer. *New England Journal of Medicine*. 2013  
35 Apr 4;368(14):1314–25.  
36  
37  
38  
39  
40  
41  
42  
43  
44  
45  
46  
47  
48  
49  
50  
51  
52  
53  
54  
55  
56  
57  
58  
59  
60

**Table 1** Baseline characteristics of men with prostate cancer by ADT use.

|                                   | All Patients      | ADT Free Cohort   | ADT users         | AA              | GnRH              |
|-----------------------------------|-------------------|-------------------|-------------------|-----------------|-------------------|
| n (%)                             | 27580<br>(100%)   | 14502<br>(52.58%) | 13078<br>(47.42%) | 1014<br>(7.75%) | 12064<br>(92.25%) |
| Mean follow up time, years (SE)   | 6.74 (3.64)       | 6.54 (3.56)       | 6.97 (3.73)       | 7.12<br>(4.34)  | 6.95 (3.68)       |
| <b>Age</b>                        |                   |                   |                   |                 |                   |
| Mean age at diagnosis, years (SE) | 67.81<br>(8.61)   | 68.71 (10.05)     | 66.81<br>(6.53)   | 66.10<br>(6.50) | 66.87<br>(6.53)   |
| <65                               | 9327<br>(33.82%)  | 5120<br>(35.31%)  | 4207<br>(32.17%)  | 374<br>(36.88%) | 3833<br>(31.77%)  |
| 65-74                             | 12441<br>(45.11%) | 4715<br>(32.51%)  | 7726<br>(59.08%)  | 580<br>(57.20%) | 7146<br>(59.23%)  |
| >75                               | 5812<br>(21.07%)  | 4667<br>(32.18%)  | 1145<br>(8.76%)   | 60<br>(5.92%)   | 1085<br>(9.00%)   |
| <b>Stage</b>                      |                   |                   |                   |                 |                   |
| I                                 | 1913<br>(6.94%)   | 1380<br>(9.52%)   | 533<br>(4.08%)    | 25<br>(2.47%)   | 508<br>(4.21%)    |
| II                                | 11986<br>(43.46%) | 6660<br>(45.92%)  | 5326<br>(40.72%)  | 460<br>(45.36%) | 4866<br>(40.34%)  |
| III                               | 7157<br>(25.95%)  | 2671<br>(18.42%)  | 4486<br>(34.30%)  | 214<br>(21.10%) | 4272<br>(35.41%)  |
| IV                                | 1461<br>(5.06%)   | 663 (4.57%)       | 798<br>(6.10%)    | 105<br>(10.36%) | 693<br>(5.74%)    |
| Unknown                           | 5063<br>(18.36%)  | 3128<br>(21.57%)  | 1935<br>(14.80%)  | 210<br>(20.71%) | 1725<br>(14.30%)  |

**Table 2** Incidence of type 2 diabetes per 1000 person-years in prostate cancer patients by ADT use

|                     | Number of patients | Number of events | Incidence rate |
|---------------------|--------------------|------------------|----------------|
| All patients        | 27580              | 1371             | 7.4            |
| ADT non-users       | 14502              | 570              | 6.0            |
| ADT users           | 13078              | 801              | 8.8            |
| GnRH agonists users | 12064              | 759              | 9.0            |
| Antiandrogen users  | 1014               | 42               | 5.8            |

**Table 3** Hazard ratios (HR) for type 2 diabetes in prostate cancer by use of ADT.

|                     | HR   | 95% CI       | aHR* | 95% CI       |
|---------------------|------|--------------|------|--------------|
| ADT free cohort     | ref. | -            | ref. |              |
| ADT users           | 1.49 | 1.34 to 1.66 | 1.47 | 1.32 to 1.64 |
| GnRH agonists users | 1.53 | 1.38 to 1.71 | 1.51 | 1.35 to 1.69 |
| Antiandrogen users  | 1.02 | 0.75 to 1.40 | 1.02 | 0.74 to 1.39 |

**Table 4** Hazard ratios (HR) for type 2 diabetes in men with prostate cancer on GnRH agonists for different periods of exposure.

| Years of exposure | Number of events | Number of patients | HR   | 95% CI       | aHR* | 95% CI       |
|-------------------|------------------|--------------------|------|--------------|------|--------------|
| 0–1               | 369              | 6800               | 1.41 | 1.23 to 1.61 | 1.38 | 1.21 to 1.58 |
| 1–2               | 139              | 2177               | 1.60 | 1.33 to 1.93 | 1.59 | 1.32 to 1.92 |
| 2–3               | 105              | 1330               | 1.77 | 1.44 to 2.18 | 1.76 | 1.42 to 2.17 |
| 3–5               | 96               | 1151               | 1.74 | 1.40 to 2.16 | 1.73 | 1.42 to 2.17 |
| >5                | 50               | 606                | 1.58 | 1.18 to 2.11 | 1.57 | 1.17 to 2.10 |

# BMJ Open

## A retrospective cohort study of androgen deprivation therapy and the risk of diabetes in men with prostate cancer in Lithuania

|                                 |                                                                                                                                                                                                                                                                                                                                                                                                                                                                                                                                                                                                                                           |
|---------------------------------|-------------------------------------------------------------------------------------------------------------------------------------------------------------------------------------------------------------------------------------------------------------------------------------------------------------------------------------------------------------------------------------------------------------------------------------------------------------------------------------------------------------------------------------------------------------------------------------------------------------------------------------------|
| Journal:                        | <i>BMJ Open</i>                                                                                                                                                                                                                                                                                                                                                                                                                                                                                                                                                                                                                           |
| Manuscript ID                   | bmjopen-2020-045797.R1                                                                                                                                                                                                                                                                                                                                                                                                                                                                                                                                                                                                                    |
| Article Type:                   | Original research                                                                                                                                                                                                                                                                                                                                                                                                                                                                                                                                                                                                                         |
| Date Submitted by the Author:   | 09-Mar-2021                                                                                                                                                                                                                                                                                                                                                                                                                                                                                                                                                                                                                               |
| Complete List of Authors:       | Drevinskaite, Mingaile; Nacionalinis vėžio institutas, Laboratory of cancer epidemiology; Vilnius University, Faculty of medicine<br>Patasius, Ausvydas; Nacionalinis vėžio institutas, Laboratory of cancer epidemiology; Vilniaus Universitetas, Faculty of Medicine, Institute of Health Sciences<br>Kincius, Marius; Nacionalinis vėžio institutas, Laboratory of Clinical Oncology<br>Urbonas, Vincas; Nacionalinis vėžio institutas, Laboratory of cancer epidemiology<br>Smailyte, Giedre; National Cancer Institute, Laboratory of Cancer Epidemiology; Vilniaus Universitetas, Faculty of Medicine, Institute of Health Sciences |
| <b>Primary Subject Heading</b>: | Epidemiology                                                                                                                                                                                                                                                                                                                                                                                                                                                                                                                                                                                                                              |
| Secondary Subject Heading:      | Urology                                                                                                                                                                                                                                                                                                                                                                                                                                                                                                                                                                                                                                   |
| Keywords:                       | Prostate disease < UROLOGY, General diabetes < DIABETES & ENDOCRINOLOGY, Epidemiology < ONCOLOGY                                                                                                                                                                                                                                                                                                                                                                                                                                                                                                                                          |
|                                 |                                                                                                                                                                                                                                                                                                                                                                                                                                                                                                                                                                                                                                           |

SCHOLARONE™  
Manuscripts



I, the Submitting Author has the right to grant and does grant on behalf of all authors of the Work (as defined in the below author licence), an exclusive licence and/or a non-exclusive licence for contributions from authors who are: i) UK Crown employees; ii) where BMJ has agreed a CC-BY licence shall apply, and/or iii) in accordance with the terms applicable for US Federal Government officers or employees acting as part of their official duties; on a worldwide, perpetual, irrevocable, royalty-free basis to BMJ Publishing Group Ltd ("BMJ") its licensees and where the relevant Journal is co-owned by BMJ to the co-owners of the Journal, to publish the Work in this journal and any other BMJ products and to exploit all rights, as set out in our [licence](#).

The Submitting Author accepts and understands that any supply made under these terms is made by BMJ to the Submitting Author unless you are acting as an employee on behalf of your employer or a postgraduate student of an affiliated institution which is paying any applicable article publishing charge ("APC") for Open Access articles. Where the Submitting Author wishes to make the Work available on an Open Access basis (and intends to pay the relevant APC), the terms of reuse of such Open Access shall be governed by a Creative Commons licence – details of these licences and which [Creative Commons](#) licence will apply to this Work are set out in our licence referred to above.

Other than as permitted in any relevant BMJ Author's Self Archiving Policies, I confirm this Work has not been accepted for publication elsewhere, is not being considered for publication elsewhere and does not duplicate material already published. I confirm all authors consent to publication of this Work and authorise the granting of this licence.



1  
2  
3  
4 1 **A retrospective cohort study of androgen deprivation therapy and the risk**  
5 2 **of diabetes in men with prostate cancer in Lithuania**  
6  
7 3  
8 4

9 5 Mingaile Drevinskaite<sup>1,3</sup> Ausvydas Patasius<sup>1,4</sup>, Marius Kincius<sup>2</sup>, Vincas Urbonas<sup>2</sup>, Giedre  
10 6 Smailyte<sup>1,4</sup>  
11 7  
12 8  
13 9

14 9  
15 10 <sup>1</sup> Laboratory of Cancer Epidemiology, National Cancer Institute, Vilnius, Lithuania

16 11 <sup>2</sup> Laboratory of Clinical Oncology, National Cancer Institute, Vilnius, Lithuania

17 12 <sup>3</sup> Faculty of Medicine, Vilnius University, Vilnius, Lithuania

18 13 <sup>4</sup> Institute of Health Sciences, Faculty of Medicine, Vilnius University, Vilnius, Lithuania  
19 14  
20 15  
21 16  
22 17  
23 18  
24 19

25 19 Corresponding author: Mingaile Drevinskaite

26 20 Email.: mingaile.drevinskaite@nvi.lt

27 21 P.Baublio 3b, Vilnius, LT-08406, Lithuania

28 22 Tel.: +37052190911  
29 23  
30 24  
31 25  
32 26  
33 27  
34 28  
35 29  
36 30  
37 31  
38 32  
39 33  
40 34  
41 35  
42 36  
43 37  
44 38  
45 39  
46 40  
47 41  
48  
49  
50  
51  
52  
53  
54  
55  
56  
57  
58  
59  
60

## 42 Abstract

43 **Objectives:** To examine the risk of type 2 diabetes in prostate cancer patients and its  
44 association with androgen deprivation therapy.

45 **Design and participants:** We performed a retrospective cohort study of patients diagnosed  
46 with prostate cancer in the Lithuanian male population between January 1, 2003 and December  
47 31, 2012 who were identified through the Lithuanian Cancer registry. All prostate cancer cases  
48 were linked to the National Health Insurance Fund (NHIF) database to obtain information  
49 regarding the diagnosis of diabetes mellitus and information on prescriptions of antiandrogens  
50 and gonadotropin-releasing hormone (GnRH) agonists. Prostate cancer patients were followed  
51 up until the diagnosis of type 2 diabetes, or December 31, 2017, or date of death, whichever  
52 came first. Cox proportional hazard models were used to estimate the risk of type 2 diabetes in  
53 prostate cancer patients with or without ADT exposure.

54 **Results:** 27 580 men were diagnosed with prostate cancer, out of whom 14 502 (52.6%) did  
55 not receive ADT and 13 078 (47.4%) were treated with ADT. The incidence of type 2 diabetes  
56 for all prostate cancer patients was 7.4/1000 person-years, for men on GnRH agonists 9.0/1000  
57 person-years and 5.8/1000 person-years for men on antiandrogens. There was an increased risk  
58 of developing type 2 diabetes comparing androgen deprivation therapy users and non-users  
59 (HR = 1.49, 95% CI = 1.34 to 1.66).

60 **Conclusion:** This study showed an increased risk of diabetes in prostate cancer patients treated  
61 with ADT in comparison to ADT-free patient cohort. GnRH agonist users showed higher  
62 susceptibility, while the group on antiandrogen monotherapy showed no such increase.

### 63 Strengths and limitations

- 64 • Large cohort size, population-based design and long observation time (up to 15 years)  
65 are strengths of our study.
- 66 • Lack of clinical information regarding treatment modality, applied for patients in  
67 combination with ADT, especially information on surgical castration.
- 68 • Differences in ADT treatment groups could be influenced by selection bias, as GnRH  
69 agonists are used for treatment of metastatic disease, however differences in ADT  
70 treatment groups remains after adjusting to stage of disease.

71

1  
2  
3 **72 Abbreviations:**  
4

5 **73 AA** – antiandrogens  
6

7 **74 ADT** – androgen deprivation therapy  
8

9 **75 CI** – confidence interval  
10

11 **76 GnRH** - gonadotropin-releasing hormone  
12

13 **77 HR** - Hazard ratio  
14

15 **78 NHIF** - National Health Insurance Fund  
16

17 **79 SE** – standard error  
18  
19  
20  
21  
22  
23

24

25 **81 1. Introduction**

26 **82** Prostate cancer is one of the most prevalent malignancies and the second leading cause of  
27 **83** cancer-related deaths in men worldwide [1]. The growth of prostate cancer cells is dependent  
28 **84** on androgens; therefore, androgen deprivation therapy (ADT) is recommended treatment in  
29 **85** men with metastatic prostate cancer. ADT is also used in clinically locally advanced prostate  
30 **86** cancer in conjunction with radiotherapy as either adjuvant or neoadjuvant therapy [2].  
31  
32  
33  
34

35 **87** ADT results in a rapid decrease in serum concentrations of testosterone to castration level by  
36 **88** reducing testicular androgens secretion or by inhibiting the androgen receptors. Androgen  
37 **89** deprivation can also be achieved with surgery (orchiectomy) or medications (gonadotropin-  
38 **90** releasing hormone (GnRH) agonists, GnRH antagonists or oral antiandrogens (AA)). In  
39 **91** addition, complete androgen blockade using combination of GnRH analogues and  
40 **92** antiandrogens can also be used in some clinical cases [3]. If prostate cancer patients progress  
41 **93** to castrate resistance state, it is recommended to continue ADT [4].  
42  
43  
44  
45  
46  
47

48 **94** Hypogonadism produced by ADT leads to adverse effects, such as increased risk of  
49 **95** cardiovascular disease and metabolic syndrome, anaemia, sexual dysfunction, decreased  
50 **96** genital size, gynaecomastia, diminished quality of life, cognitive lesion, hot flushes and  
51 **97** reduced bone mineral density [5–8]. One of the newest long-term effect observed in other  
52 **98** studies is ADT increasing insulin resistance and having an impact on type 2 diabetes  
53 **99** development [5,9–12].  
54  
55  
56  
57  
58  
59  
60

1  
2  
3 100 In our large population-based cohort study, we examined the risk of type 2 diabetes in prostate  
4 cancer patients and its association with ADT.  
5 101

## 6 7 102 **2. Research Design and Methods**

### 8 9 103 **Study population**

10 104 We performed a retrospective cohort study of patients diagnosed with prostate cancer in the  
11  
12 105 entire Lithuanian male population between January 1, 2003 and December 31, 2012 who were  
13  
14 106 identified through the Lithuanian Cancer registry. The database includes information about the  
15  
16 107 date of diagnosis, age at diagnosis, tumour stage (classified by TNM), cause and date of death.  
17  
18 108 Lithuanian data on cancer incidence is included Cancer Incidence in Five Continents, a  
19  
20 109 longstanding collaboration between the International Agency for Research on Cancer and the  
21  
22 110 International Association of Cancer Registries, which serves as a unique source of cancer  
23  
24 111 incidence data from high-quality population-based cancer registries around the world [13].  
25

26  
27 112 All prostate cancer cases were linked to the National Health Insurance Fund (NHIF) database  
28  
29 113 in order to obtain information regarding the diagnosis of diabetes mellitus and information on  
30  
31 114 prescriptions of antiandrogens and GnRH agonists. Data linkage between databases was based  
32  
33 115 on the personal identification code, which is unique to each resident in Lithuania. The National  
34  
35 116 Health Insurance Fund (NHIF) database contains demographic data and entries on the primary  
36  
37 117 and secondary healthcare services provided, emergency and hospital admissions and  
38  
39 118 prescriptions of reimbursed medications. Data from the Lithuanian NHIF database  
40  
41 119 encompasses about 98% of inpatient cases and 90% of outpatient visits (up to 100% of primary  
42  
43 120 health care visits) in Lithuania, covering the entire territory of the country [14]. Male patients,  
44  
45 121 who in NHIF database were registered with type 2 diabetes (International Classification of  
46  
47 122 Diseases (ICD)-10 code E11) were considered diabetic. Men who received GnRH agonists or  
48  
49 123 antiandrogens for at least six months were defined as ADT users.

50 124 In total between January 1, 2003 and December 31, 2012 29247 cases of prostate cancer were  
51  
52 125 identified. Prostate cancer patients with date of prostate cancer diagnosis equal to the date of  
53  
54 126 death (607 cases) and patient with diabetes mellitus diagnosis before prostate cancer diagnosis  
55  
56 127 (1060 cases), were excluded from the analysis. 27580 prostate cancer patients were included  
57  
58 128 in this study.

### 59 129 **Statistical analysis**

60

1  
2  
3 130 We analyzed risk of diabetes between men on ADT, and prostate cancer patients not treated  
4  
5 131 with ADT. Identified patients were followed till the date of type 2 diabetes diagnosis, or  
6  
7 132 December 31, 2017, or date of death, whichever came first.

8  
9 133 In order to evaluate risk of developing diabetes among ADT users in prostate cancer patients'  
10  
11 134 cohort we calculated exact person-years at risk for each patient.

12  
13 135 Cox proportional hazard models were used to estimate hazard ratios and their 95% confidence  
14  
15 136 intervals to compare risk of diabetes in groups of prostate cancer patients by ADT exposure.  
16  
17 137 Multivariate adjusted Cox proportional hazards models including age and stage at diagnosis  
18  
19 138 were conducted to estimate the effect of ADT on diabetes risk. Association between duration  
20  
21 139 of GnRH agonists use and diabetes risk was assessed by dividing duration into the following  
22  
23 140 intervals: 0-1, 1-2, 2-3, 3-5 and more than 5 years. GnRH agonists' users to the duration group  
24  
25 141 were assigned by cumulative exposure.

26 142 All statistical analyses were carried out using STATA statistical software (version 15.1;  
27  
28 143 College Station, TX, USA). The Vilnius Regional Biomedical Research Ethics Committee  
29  
30 144 approved this study.

### 31 145 **Patient and public involment**

32  
33  
34 146 This article does not contain any studies with human participants. No patients were involved  
35  
36 147 in this study. Our study was based on retrospective data collected in national health insurance  
37  
38 148 fund database.

### 39 40 149 **3. Results**

41  
42 150 **Table 1** presents baseline characteristics of 27 580 men who were diagnosed with prostate  
43  
44 151 cancer, out of whom 14 502 (52.6%) did not receive ADT and 13 078 (47.4%) were treated  
45  
46 152 with ADT. The vast majority of patients (92.2%) received GnRH agonists and 7.8% received  
47  
48 153 antiandrogens. There were significant differences between ADT free cohort and ADT users  
49  
50 154 according the mean age and stage distribution.

51  
52 155 During follow-up period there were 1371 prostate cancer patients diagnosed with type 2  
53  
54 156 diabetes. The incidence of type 2 diabetes for all prostate cancer patients (ADT users and ADT  
55  
56 157 non-users) was 7.4/1000 person-years. For those who have never used ADT the incidence was  
57  
58 158 6.0/1000 person-years. Type 2 diabetes Incidence for ADT users was 8.8/1000 person-years,  
59  
60 159 for men on GnRH agonists 9.0/1000 person-years and 5.8/1000 person-years for men on  
160  
160 160 antiandrogens (**Table 2**).

1  
2  
3 161 There was a significantly increased risk of developing of type 2 diabetes comparing ADT users  
4 with ADT non-users (HR = 1.49, 95% CI = 1.34 to 1.66) (**Table 3**). Adjusted hazards models  
5 162  
6 163 for patient's age and tumour's stage also showed a statistically higher risk of developing type  
7  
8 164 2 diabetes (aHR = 1.47, 95% CI = 1.32 to 1.64) in ADT users group. As compared to ADT  
9 165 non-users the usage of GnRH agonists was associated with an increased risk of type 2 diabetes  
10 166 (HR = 1.53, 95% CI = 1.38 to 1.71), however, there was no significant association between  
11  
12 167 oral antiandrogen monotherapy and outcome.

13  
14  
15  
16 168 **Table 4** reports diabetes risk in the group of GnRH agonists users. There were no significant  
17 169 differences in risk by duration of GnRH agonists exposure duration.

#### 18 19 20 170 **4. Discussion**

21  
22  
23 171 Our prostate cancer patient cohort study showed increased risk of diabetes in ADT users  
24 172 compared to ADT-free patient cohort. In accordance with other studies, elevated risk was found  
25 173 among GnRH agonist users, while in the antiandrogen monotherapy group no such increase  
26 174 was observed.

27  
28  
29  
30 175 ADT, which decreases serum testosterone levels by inhibiting testosterone production, has  
31 176 been the first line treatment for men with locally advanced or metastatic prostate cancer since  
32 177 1940 [15]. ADT can reduce circulating testosterone levels to castration levels, however,  
33 178 previous studies have shown that low levels of testosterone might decrease lean body mass  
34 179 growth and increase fat deposition, also might cause insulin resistance by reducing insulin  
35 180 sensitivity [16,17]. The association between ADT users in prostate cancer patients and insulin  
36 181 resistance was identified in *Basaria et al.* study. Patients who received ADT for at least 12  
37 182 months had an increased risk of developing insulin resistance and hyperglycaemia. Forty-four  
38 183 percents of ADT patients had glucose levels in the diabetic range and the duration of ADT was  
39 184 linked to the severity of these metabolic abnormalities [9]. *Bosco et al.* meta-analysis results  
40 185 suggested that ADT usage for prostate cancer patients increased risk of diabetes by 36% [18].  
41 186 In our study we also observed that ADT usage increases the risk of diabetes compared to ADT  
42 187 non-users (HR: 1.49 95% CI 1.34 to 1.66).

43  
44  
45  
46 188 *Keating et al.* found that the treatment with GnRH agonists is associated with an increased risk  
47 189 of type 2 diabetes compared to ADT non-users (HR for GnRH agonists versus no ADT: 1.44,  
48 190 95% CI: 1.34 – 1.55) [5]. *Crawley et al.* evaluated the risk of type 2 diabetes for the patients  
49 191 treated with GnRH agonists or antiandrogens. They found that GnRH agonists increase the risk

1  
2  
3 192 of type 2 diabetes. In contrast management with antiandrogens was not associated with type 2  
4  
5 193 diabetes [12]. In our study we showed the highest risk of diabetes was in GnRH agonists users  
6  
7 194 group (HR: 1.53, 95% CI 1.38 to 1.71). This data is in line with above mentioned studies.  
8

9  
10 195 The duration of ADT is a very important factor when trying to establish the link between type  
11  
12 196 2 diabetes and ADT. *Keating et al.* showed increase risk of type 2 diabetes for patients on  
13  
14 197 GnRH agonists, however, this study had a relatively short duration (up to 25 months) [5]. To  
15  
16 198 our knowledge *Crawley et colleagues* were the first that evaluated different types of ADT and  
17  
18 199 the effect of treatment duration. They examined the risk of type 2 diabetes with up to ten years  
19  
20 200 of exposure. In their study they revealed that patients on GnRH agonists during the first 3 years  
21  
22 201 (2 – 2.5 years of exposure HR: 1.68, 95% CI 1.40 to 2.02) had the highest risk of developing  
23  
24 202 type 2 diabetes [12]. Similarly, we showed that the highest incidence of diabetes was in the 3-  
25  
26 203 year-exposure group (HR: 1.77, 95% CI 1.44 to 2.18), however, the risk was also significantly  
27  
28 204 elevated in other categories.

29  
30 205 Intermittent ADT treatment was suggested as alternative treatment to continuous ADT with  
31  
32 206 possibly fewer complications and better quality of life [19]. *Rezaei et al.* study's results showed  
33  
34 207 that in short-term treatment with intermittent ADT there was no difference in fasting blood  
35  
36 208 glucose, which suggests lower risks of diabetes mellitus in this group of patients [20]. Thus,  
37  
38 209 difference in diabetes risk increase between non-users and ADT users could be mitigated by  
39  
40 210 the proportion of intermittent ADT user in our cohort, whom we could not identify from our  
41  
42 211 database. However, according to general used prostate cancer treatment guidelines intermittent  
43  
44 212 ADT could be applicable only for very small and well-informed fraction of prostate cancer  
45  
46 213 patients [21]. Therefore, we consider that this should not influence the final results of our study.  
47  
48 214 Large cohort size, population-based design and long observation time (up to 15 years) are  
49  
50 215 strenghts of our study. Main limitation of our study is lack of clinical information regarding  
51  
52 216 treatment modality, applied for patients in combination with ADT, especially information on  
53  
54 217 surgical castration. This type of ADT is not common in clinical practice, therefore inclusion of  
55  
56 218 those cases in non-ADT patients group has no substantial effect on diabetes risk evaluation.  
57  
58 219 Another limitation is that differences in ADT treatment groups could be influenced by selection  
59  
60 220 bias, as GnRH agonists are used for treatment of metastatic disease, however differences in  
221 ADT treatment groups remains after adjusting to stage of disease.

## 222 5. Conclusion

1  
2  
3 223 This study showed that there is increased risk of diabetes in prostate cancer patients treated  
4 224 with ADT in comparison with ADT-free patient cohort. GnRH agonist users showed higher  
5 225 susceptibility while the group on antiandrogen monotherapy showed no such increase.  
6  
7

### 8 9 226 **Ethics approval**

10  
11 227 This research was approved by Vilnius regional bioethics committee (Nr. 158200-16-879-388).  
12 228 Bioethics committee waived off informed consent.  
13  
14

### 15 229 **Funding**

16 230 This research received no specific grant from any funding agency in the public, commercial or  
17 231 not-for-profit sectors.  
18  
19

### 20 232 **Competing interests**

21  
22  
23 233 The authors declare no conflict of interest.  
24

### 25 234 **Contributorship statement**

26  
27 235 Conceptualization, Mingaile Drevinskaite, Ausvydas Patasius and Giedre Smailyte; Planning,  
28 236 Ausvydas Patasius, Marius Kincius, Vincas Urbonas, Giedre Smailyte; Data curation, Giedre  
29 237 Smailyte; Formal analysis, Ausvydas Patasius and Giedre Smailyte; Methodology, Ausvydas  
30 238 Patasius and Giedre Smailyte; Project administration, Giedre Smailyte; Resources, Giedre  
31 239 Smailyte; Supervision, Giedre Smailyte; Writing – original draft, Mingaile Drevinskaite;  
32 240 Writing – review & editing, Ausvydas Patasius, Marius Kincius, Vincas Urbonas and Giedre  
33 241 Smailyte; Conception and design, Marius Kincius, Vincas Urbonas, Giedre Smailyte.  
34  
35  
36  
37  
38  
39

### 40 242 **Data availability**

41  
42  
43 243 Data are available upon reasonable request.  
44  
45  
46  
47

### 48 245 **References**

- 49  
50 246 1. Siegel RL, Miller KD, Jemal A. Cancer statistics, 2019. *CA Cancer J Clin.* 2019 Jan;69(1):7–34.  
51  
52 247 2. Parker C, Gillessen S, Heidenreich A, Horwich A, ESMO Guidelines Committee. Cancer of the  
53 248 prostate: ESMO Clinical Practice Guidelines for diagnosis, treatment and follow-up. *Ann Oncol.*  
54 249 2015 Sep;26 Suppl 5:v69-77.  
55  
56 250 3. Jhan J-H, Yeh H-C, Chang Y-H, Guu S-J, Wu W-J, Chou Y-H, et al. New-onset diabetes after  
57 251 androgen-deprivation therapy for prostate cancer: A nationwide propensity score-matched  
58 252 four-year longitudinal cohort study. *J Diabetes Complicat.* 2018;32(7):688–92.  
59  
60



- 1  
2  
3 253 4. Lycken M, Garmo H, Adolfsson J, Stattin P, Holmberg L, Bill-Axelsson A. Patterns of androgen  
4 254 deprivation therapies among men diagnosed with localised prostate cancer: a population-  
5 255 based study. *Eur J Cancer*. 2014 Jul;50(10):1789–98.
- 7 256 5. Keating NL, O'Malley AJ, Smith MR. Diabetes and cardiovascular disease during androgen  
8 257 deprivation therapy for prostate cancer. *J Clin Oncol*. 2006 Sep 20;24(27):4448–56.
- 10 258 6. Choo R, Chander S, Danjoux C, Morton G, Pearce A, Deboer G, et al. How are hemoglobin levels  
12 259 affected by androgen deprivation in non-metastatic prostate cancer patients? *Can J Urol*. 2005  
13 260 Feb;12(1):2547–52.
- 15 261 7. Nguyen PL, Alibhai SMH, Basaria S, D'Amico AV, Kantoff PW, Keating NL, et al. Adverse effects  
16 262 of androgen deprivation therapy and strategies to mitigate them. *Eur Urol*. 2015  
17 263 May;67(5):825–36.
- 19 264 8. Rhee H, Gunter JH, Heathcote P, Ho K, Stricker P, Corcoran NM, et al. Adverse effects of  
20 265 androgen-deprivation therapy in prostate cancer and their management. *BJU Int*. 2015 Apr;115  
21 266 Suppl 5:3–13.
- 24 267 9. Basaria S, Muller DC, Carducci MA, Egan J, Dobs AS. Hyperglycemia and insulin resistance in  
25 268 men with prostate carcinoma who receive androgen-deprivation therapy. *Cancer*. 2006 Feb  
26 269 1;106(3):581–8.
- 28 270 10. Keating NL, O'Malley AJ, Freedland SJ, Smith MR. Diabetes and cardiovascular disease during  
29 271 androgen deprivation therapy: observational study of veterans with prostate cancer. *J Natl*  
30 272 *Cancer Inst*. 2010 Jan 6;102(1):39–46.
- 32 273 11. Lage MJ, Barber BL, Markus RA. Association between androgen-deprivation therapy and  
33 274 incidence of diabetes among males with prostate cancer. *Urology*. 2007 Dec;70(6):1104–8.
- 36 275 12. Crawley D, Garmo H, Rudman S, Stattin P, Häggström C, Zethelius B, et al. Association between  
37 276 duration and type of androgen deprivation therapy and risk of diabetes in men with prostate  
38 277 cancer. *Int J Cancer*. 2016 Dec 15;139(12):2698–704.
- 40 278 13. Bray F, Ferlay J, Laversanne M, Brewster DH, Gombe Mbalawa C, Kohler B, et al. Cancer  
41 279 Incidence in Five Continents: Inclusion criteria, highlights from Volume X and the global status  
42 280 of cancer registration. *Int J Cancer*. 2015 Nov 1;137(9):2060–71.
- 44 281 14. Navickas R, Visockienė Ž, Purnaitė R, Rukšėnienė M, Kasiulevičius V, Jurevičienė E. Prevalence  
45 282 and structure of multiple chronic conditions in Lithuanian population and the distribution of  
46 283 the associated healthcare resources. *Eur J Intern Med*. 2015 Apr;26(3):160–8.
- 48 284 15. Huggins C, Stevens RE, Hodges CV. STUDIES ON PROSTATIC CANCER: II. THE EFFECTS OF  
49 285 CASTRATION ON ADVANCED CARCINOMA OF THE PROSTATE GLAND. *Arch Surg*. 1941 Aug  
50 286 1;43(2):209–23.
- 53 287 16. Smith MR. Changes in fat and lean body mass during androgen-deprivation therapy for  
54 288 prostate cancer. *Urology*. 2004 Apr;63(4):742–5.
- 56 289 17. Smith MR, Lee H, Nathan DM. Insulin sensitivity during combined androgen blockade for  
57 290 prostate cancer. *J Clin Endocrinol Metab*. 2006 Apr;91(4):1305–8.
- 59  
60

- 1  
2  
3 291 18. Bosco C, Crawley D, Adolfsson J, Rudman S, Van Hemelrijck M. Quantifying the evidence for the  
4 292 risk of metabolic syndrome and its components following androgen deprivation therapy for  
5 293 prostate cancer: a meta-analysis. PLoS ONE. 2015;10(3):e0117344.  
6  
7 294 19. Tunn UW, Canepa G, Kochanowsky A, Kienle E. Testosterone recovery in the off-treatment  
8 295 time in prostate cancer patients undergoing intermittent androgen deprivation therapy.  
9 296 Prostate Cancer Prostatic Dis. 2012 Sep;15(3):296–302.  
10  
11 297 20. Rezaei MM, Rezaei MM, Ghoreifi A, Kerigh BF. Metabolic syndrome in patients with prostate  
12 298 cancer undergoing intermittent androgen-deprivation therapy. Can Urol Assoc J. 2016;10(9–  
13 299 10):E300–5.  
14  
15 300 21. Hussain M, Tangen CM, Berry DL, Higano CS, Crawford ED, Liu G, et al. Intermittent versus  
16 301 Continuous Androgen Deprivation in Prostate Cancer. New England Journal of Medicine. 2013  
17 302 Apr 4;368(14):1314–25.  
18  
19  
20 303  
21  
22  
23  
24  
25  
26  
27  
28  
29  
30  
31  
32  
33  
34  
35  
36  
37  
38  
39  
40  
41  
42  
43  
44  
45  
46  
47  
48  
49  
50  
51  
52  
53  
54  
55  
56  
57  
58  
59  
60

304 **Table 1** Baseline characteristics of men with prostate cancer by ADT use.

|                                   | All Patients     | ADT Free Cohort  | ADT users        | AA              | GnRH             | p value* |
|-----------------------------------|------------------|------------------|------------------|-----------------|------------------|----------|
| n (%)                             | 27580<br>(100%)  | 14502<br>(52.6%) | 13078<br>(47.4%) | 1014<br>(7.8%)  | 12064<br>(92.2%) |          |
| Mean follow up time, years (SE)   | 6.74 (3.64)      | 6.54 (3.56)      | 6.97 (3.73)      | 7.12<br>(4.34)  | 6.95 (3.68)      |          |
| <b>Age</b>                        |                  |                  |                  |                 |                  |          |
| Mean age at diagnosis, years (SE) | 67.81<br>(8.61)  | 68.71 (10.05)    | 66.81<br>(6.53)  | 66.10<br>(6.50) | 66.87<br>(6.53)  | <0.001   |
| <65                               | 9327<br>(33.9%)  | 5120<br>(35.3%)  | 4207<br>(32.2%)  | 374<br>(36.9%)  | 3833<br>(31.8%)  |          |
| 65-74                             | 12441<br>(45.1%) | 4715<br>(32.5%)  | 7726<br>(59.0%)  | 580<br>(57.2%)  | 7146<br>(59.2%)  |          |
| >75                               | 5812<br>(21.0%)  | 4667<br>(32.2%)  | 1145<br>(8.8%)   | 60 (5.9%)       | 1085<br>(9.0%)   |          |
| <b>Stage</b>                      |                  |                  |                  |                 |                  |          |
| I                                 | 1913<br>(6.9%)   | 1380 (9.5%)      | 533 (4.0%)       | 25 (2.5%)       | 508 (4.2%)       | <0.001   |
| II                                | 11986<br>(43.5%) | 6660<br>(45.9%)  | 5326<br>(40.8%)  | 460<br>(45.3%)  | 4866<br>(40.4%)  |          |
| III                               | 7157<br>(25.9%)  | 2671<br>(18.4%)  | 4486<br>(34.3%)  | 214<br>(21.1%)  | 4272<br>(35.4%)  |          |
| IV                                | 1461<br>(5.3%)   | 663 (4.6%)       | 798 (6.1%)       | 105<br>(10.4%)  | 693 (5.7%)       |          |
| Unknown                           | 5063<br>(18.4%)  | 3128<br>(21.6%)  | 1935<br>(14.8%)  | 210<br>(20.7%)  | 1725<br>(14.3%)  |          |

305 \* shows significance of differences between the ADT free cohort and ADT users

306

307

308

309

310

311 **Table 2** Incidence of type 2 diabetes per 1000 person-years in prostate cancer patients by ADT  
 312 use

|                     | Number of patients | Number of events | Person years | Incidence rate |
|---------------------|--------------------|------------------|--------------|----------------|
| All patients        | 27580              | 1371             | 185961,74    | 7.4            |
| ADT non-users       | 14502              | 570              | 94866,21     | 6.0            |
| ADT users           | 13078              | 801              | 91095,53     | 8.8            |
| GnRH agonists users | 12064              | 759              | 87683,91     | 9.0            |
| Antiandrogen users  | 1014               | 42               | 3411,62      | 5.8            |

313

314 **Table 3** Hazard ratios (HR) for type 2 diabetes in prostate cancer by use of ADT.

|                     | HR   | 95% CI       | aHR* | 95% CI       |
|---------------------|------|--------------|------|--------------|
| ADT free cohort     | ref. | -            | ref. | -            |
| ADT users           | 1.49 | 1.34 to 1.66 | 1.47 | 1.32 to 1.64 |
| GnRH agonists users | 1.53 | 1.38 to 1.71 | 1.51 | 1.35 to 1.69 |
| Antiandrogen users  | 1.02 | 0.75 to 1.40 | 1.02 | 0.74 to 1.39 |

315 \* adjusted for age and stage

316

317 **Table 4** Hazard ratios (HR) for type 2 diabetes in men with prostate cancer on GnRH  
 318 agonists for different periods of exposure.

| Years of exposure | Number of events | Number of patients | HR   | 95% CI       | aHR* | 95% CI       |
|-------------------|------------------|--------------------|------|--------------|------|--------------|
| ADT free cohort   | 570              | 14502              | ref. | -            | Ref. | -            |
| 0–1               | 369              | 6800               | 1.41 | 1.23 to 1.61 | 1.38 | 1.21 to 1.58 |
| 1–2               | 139              | 2177               | 1.60 | 1.33 to 1.93 | 1.59 | 1.32 to 1.92 |
| 2–3               | 105              | 1330               | 1.77 | 1.44 to 2.18 | 1.76 | 1.42 to 2.17 |
| 3–5               | 96               | 1151               | 1.74 | 1.40 to 2.16 | 1.73 | 1.42 to 2.17 |
| >5                | 50               | 606                | 1.58 | 1.18 to 2.11 | 1.57 | 1.17 to 2.10 |

319 \* adjusted for age and stage

320

321

322

STROBE Statement—Checklist of items that should be included in reports of *cohort studies*

|                              | Item No | Recommendation                                                                                                                                                                                                                                                                                                                                                                                                              |
|------------------------------|---------|-----------------------------------------------------------------------------------------------------------------------------------------------------------------------------------------------------------------------------------------------------------------------------------------------------------------------------------------------------------------------------------------------------------------------------|
| <b>Title and abstract</b>    | 1       | (a) Indicate the study's design with a commonly used term in the title or the abstract [Page 1; lines 1-2]<br>(b) Provide in the abstract an informative and balanced summary of what was done and what was found [Page 2; lines 42-62]                                                                                                                                                                                     |
| <b>Introduction</b>          |         |                                                                                                                                                                                                                                                                                                                                                                                                                             |
| Background/rationale         | 2       | Explain the scientific background and rationale for the investigation being reported [Page 3-4, lines 87-107]                                                                                                                                                                                                                                                                                                               |
| Objectives                   | 3       | State specific objectives, including any prespecified hypotheses [Page 4, lines 106-107]                                                                                                                                                                                                                                                                                                                                    |
| <b>Methods</b>               |         |                                                                                                                                                                                                                                                                                                                                                                                                                             |
| Study design                 | 4       | Present key elements of study design early in the paper                                                                                                                                                                                                                                                                                                                                                                     |
| Setting                      | 5       | Describe the setting, locations, and relevant dates, including periods of recruitment, exposure, follow-up, and data collection [Page 4, lines 110-117]                                                                                                                                                                                                                                                                     |
| Participants                 | 6       | (a) Give the eligibility criteria, and the sources and methods of selection of participants. Describe methods of follow-up [Page 4-5, lines 118-134]<br>(b) For matched studies, give matching criteria and number of exposed and unexposed                                                                                                                                                                                 |
| Variables                    | 7       | Clearly define all outcomes, exposures, predictors, potential confounders, and effect modifiers. Give diagnostic criteria, if applicable [Page 5, 136-140]                                                                                                                                                                                                                                                                  |
| Data sources/<br>measurement | 8*      | For each variable of interest, give sources of data and details of methods of assessment (measurement). Describe comparability of assessment methods if there is more than one group<br><b>Exposed and Unexposed group [Page 5, lines 141-147]</b>                                                                                                                                                                          |
| Bias                         | 9       | Describe any efforts to address potential sources of bias [Page 2, lines 68-70]                                                                                                                                                                                                                                                                                                                                             |
| Study size                   | 10      | Explain how the study size was arrived at [Page 4, lines 130-134]                                                                                                                                                                                                                                                                                                                                                           |
| Quantitative variables       | 11      | Explain how quantitative variables were handled in the analyses. If applicable, describe which groupings were chosen and why [quantitative variable - age]                                                                                                                                                                                                                                                                  |
| Statistical methods          | 12      | (a) Describe all statistical methods, including those used to control for confounding [Page 5, lines 141-147]<br>(b) Describe any methods used to examine subgroups and interactions [Cox proportional Hazard]<br>(c) Explain how missing data were addressed [not applicable]<br>(d) If applicable, explain how loss to follow-up was addressed [not applicable]<br>(e) Describe any sensitivity analyses [not applicable] |
| <b>Results</b>               |         |                                                                                                                                                                                                                                                                                                                                                                                                                             |
| Participants                 | 13*     | (a) Report numbers of individuals at each stage of study—eg numbers potentially eligible, examined for eligibility, confirmed eligible, included in the study, completing follow-up, and analysed [Page 5, lines 156-160]<br>(b) Give reasons for non-participation at each stage [not applicable]<br>(c) Consider use of a flow diagram [not applicable]                                                                   |
| Descriptive data             | 14*     | (a) Give characteristics of study participants (eg demographic, clinical, social) and information on exposures and potential confounders [Page 5, lines 156-160]<br>(b) Indicate number of participants with missing data for each variable of interest [not applicable]                                                                                                                                                    |

|                          |     |                                                                                                                                                                                                                                                                                                                                                                                                                                                                                             |
|--------------------------|-----|---------------------------------------------------------------------------------------------------------------------------------------------------------------------------------------------------------------------------------------------------------------------------------------------------------------------------------------------------------------------------------------------------------------------------------------------------------------------------------------------|
|                          |     | (c) Summarise follow-up time (eg, average and total amount) [Page 2, lines 64-65] [Page 6, lines 162-163]                                                                                                                                                                                                                                                                                                                                                                                   |
| Outcome data             | 15* | Report numbers of outcome events or summary measures over time [Page 6, lines 161-166]                                                                                                                                                                                                                                                                                                                                                                                                      |
| Main results             | 16  | (a) Give unadjusted estimates and, if applicable, confounder-adjusted estimates and their precision (eg, 95% confidence interval). Make clear which confounders were adjusted for and why they were included [Page 6, lines 167-173 + Table 3. Adjusted to age and stage]<br>(b) Report category boundaries when continuous variables were categorized<br>(c) If relevant, consider translating estimates of relative risk into absolute risk for a meaningful time period [not applicable] |
| Other analyses           | 17  | Report other analyses done—eg analyses of subgroups and interactions, and sensitivity analyses [not applicable]                                                                                                                                                                                                                                                                                                                                                                             |
| <b>Discussion</b>        |     |                                                                                                                                                                                                                                                                                                                                                                                                                                                                                             |
| Key results              | 18  | Summarise key results with reference to study objectives [Page 6-7, lines 177-227]                                                                                                                                                                                                                                                                                                                                                                                                          |
| Limitations              | 19  | Discuss limitations of the study, taking into account sources of potential bias or imprecision. Discuss both direction and magnitude of any potential bias [Page 7-8, lines 220-227]                                                                                                                                                                                                                                                                                                        |
| Interpretation           | 20  | Give a cautious overall interpretation of results considering objectives, limitations, multiplicity of analyses, results from similar studies, and other relevant evidence [Page 7-8, lines 177-227]                                                                                                                                                                                                                                                                                        |
| Generalisability         | 21  | Discuss the generalisability (external validity) of the study results                                                                                                                                                                                                                                                                                                                                                                                                                       |
| <b>Other information</b> |     |                                                                                                                                                                                                                                                                                                                                                                                                                                                                                             |
| Funding                  | 22  | Give the source of funding and the role of the funders for the present study and, if applicable, for the original study on which the present article is based [Page 3, lines 72-74]                                                                                                                                                                                                                                                                                                         |

\*Give information separately for exposed and unexposed groups.

**Note:** An Explanation and Elaboration article discusses each checklist item and gives methodological background and published examples of transparent reporting. The STROBE checklist is best used in conjunction with this article (freely available on the Web sites of PLoS Medicine at <http://www.plosmedicine.org/>, Annals of Internal Medicine at <http://www.annals.org/>, and Epidemiology at <http://www.epidem.com/>). Information on the STROBE Initiative is available at <http://www.strobe-statement.org>.
